# Supplementary material for: Multidrug Resistance in Mammals and Fungi—From MDR to PDR: A Rocky Road from Atomic Structures to Transport Mechanisms
Source: Int J Mol Sci. 2021 Apr 30;22(9):4806. doi: 10.3390/ijms22094806 (PMC8124828; doi:10.3390/ijms22094806)
Supplement: Supplementary file 1 [file ijms-22-04806-s001.zip › IJMS-1178190-Supplementary.pdf]

## Supplementary Information

# Multidrug Resistance in Mammals and Fungi—From MDR to PDR: A Rocky Road from Atomic Structures to Transport Mechanisms

Narakorn Khunweeraphong and Karl Kuchler \*

Center for Medical Biochemistry, Max Perutz Labs Vienna, Campus Vienna Biocenter, Medical University of Vienna, Dr. Bohr-Gasse 9/2, A-1030 Vienna, Austria; [narakorn.khunweeraphong@meduniwien.ac.at](mailto:narakorn.khunweeraphong@meduniwien.ac.at)

\* Correspondence: [karl.kuchler@meduniwien.ac.at](mailto:karl.kuchler@meduniwien.ac.at); Tel.: +43-1-4277-61807; Fax: +43-1-4277-9618

**Keywords:** yeast; multidrug transporter; anticancer; antifungal resistance; ABC transporters; mechanism

## Supplementary Figures and Legends

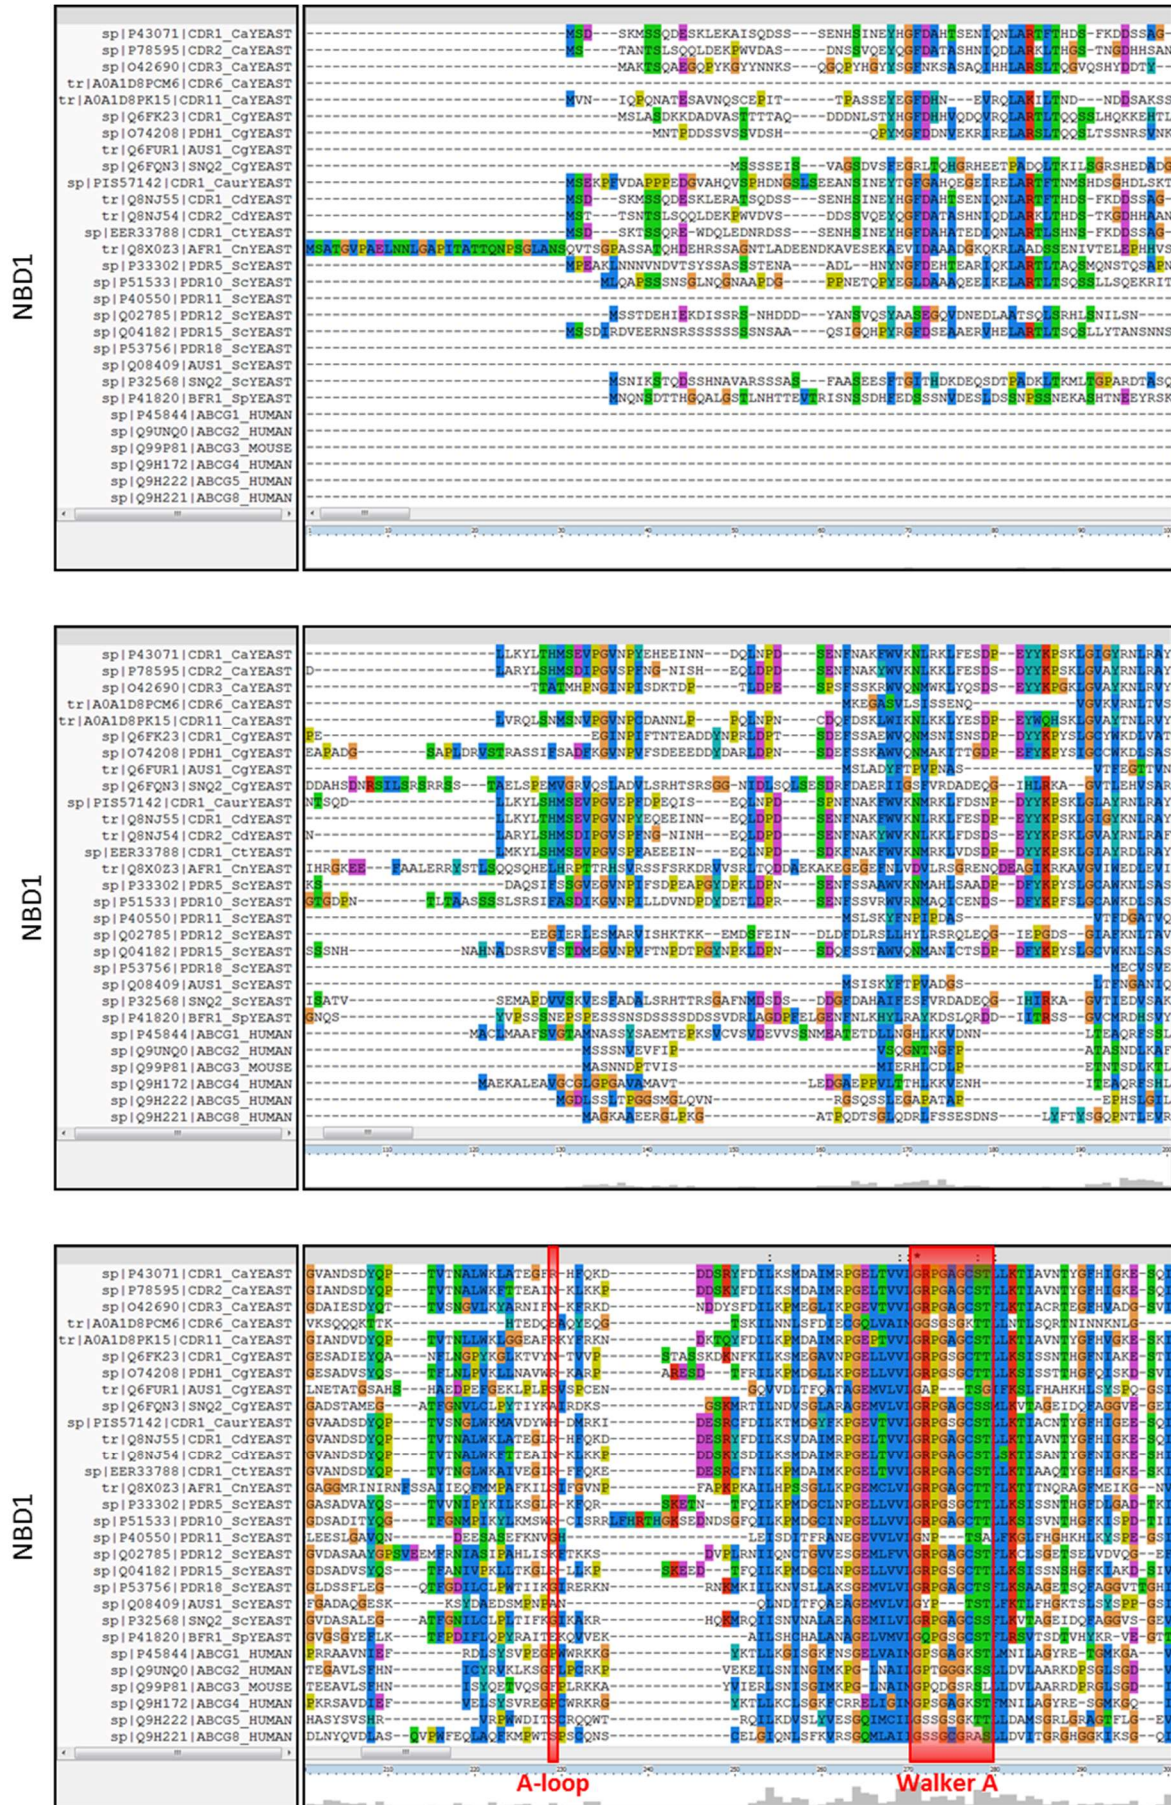

NBD1

sp|P43071|CDR1\_CaYEAST  
 sp|P78595|CDR2\_CaYEAST  
 sp|O42690|CDR3\_CaYEAST  
 tr|A0A1D8PC6|CDR6\_CaYEAST  
 tr|A0A1D8PK15|CDR11\_CaYEAST  
 sp|Q6FK23|CDR1\_CgYEAST  
 sp|O74208|PDH1\_CgYEAST  
 tr|Q6FUR1|AUS1\_CgYEAST  
 sp|Q6FQ23|SNQ2\_CgYEAST  
 sp|PIS57142|CDR1\_CaurYEAST  
 tr|Q8N555|CDR1\_CdYEAST  
 tr|Q8N554|CDR2\_CdYEAST  
 sp|EER33788|CDR1\_CtYEAST  
 tr|Q8X023|AFR1\_CnYEAST  
 sp|P33302|PDR5\_ScYEAST  
 sp|P32568|PDR10\_ScYEAST  
 sp|P40550|PDR11\_ScYEAST  
 sp|Q02785|PDR12\_ScYEAST  
 sp|Q04182|PDR15\_ScYEAST  
 sp|P53756|PDR18\_ScYEAST  
 sp|Q08409|AUS1\_ScYEAST  
 sp|P32568|SNQ2\_ScYEAST  
 sp|P41820|BFR1\_SpYEAST  
 sp|P45844|ABCG1\_HUMAN  
 sp|Q9UNQ0|ABCG2\_HUMAN  
 sp|Q99P81|ABCG3\_MOUSE  
 sp|Q9H172|ABCG4\_HUMAN  
 sp|Q9H222|ABCG5\_HUMAN  
 sp|Q9H221|ABCG8\_HUMAN

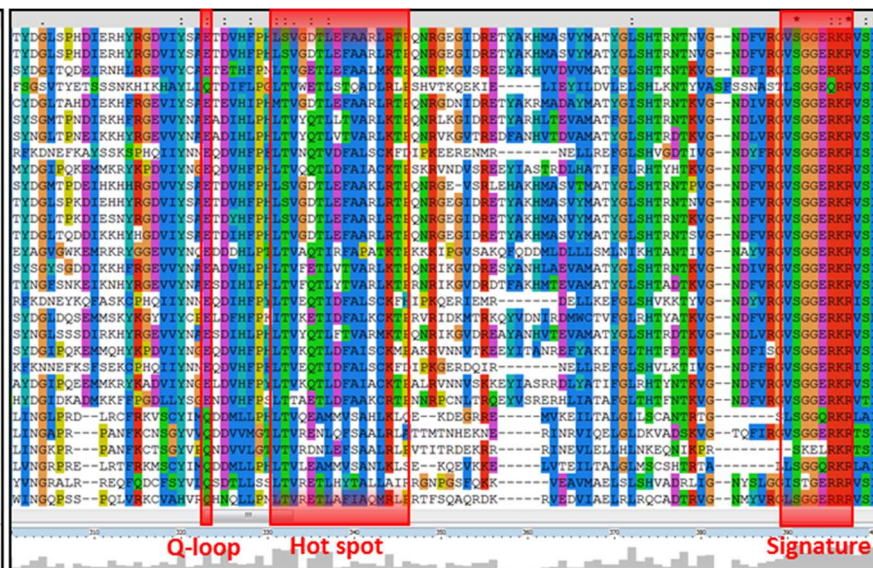

NBD1

sp|P43071|CDR1\_CaYEAST  
 sp|P78595|CDR2\_CaYEAST  
 sp|O42690|CDR3\_CaYEAST  
 tr|A0A1D8PC6|CDR6\_CaYEAST  
 tr|A0A1D8PK15|CDR11\_CaYEAST  
 sp|Q6FK23|CDR1\_CgYEAST  
 sp|O74208|PDH1\_CgYEAST  
 tr|Q6FUR1|AUS1\_CgYEAST  
 sp|Q6FQ23|SNQ2\_CgYEAST  
 sp|PIS57142|CDR1\_CaurYEAST  
 tr|Q8N555|CDR1\_CdYEAST  
 tr|Q8N554|CDR2\_CdYEAST  
 sp|EER33788|CDR1\_CtYEAST  
 tr|Q8X023|AFR1\_CnYEAST  
 sp|P33302|PDR5\_ScYEAST  
 sp|P32568|PDR10\_ScYEAST  
 sp|P40550|PDR11\_ScYEAST  
 sp|Q02785|PDR12\_ScYEAST  
 sp|Q04182|PDR15\_ScYEAST  
 sp|P53756|PDR18\_ScYEAST  
 sp|Q08409|AUS1\_ScYEAST  
 sp|P32568|SNQ2\_ScYEAST  
 sp|P41820|BFR1\_SpYEAST  
 sp|P45844|ABCG1\_HUMAN  
 sp|Q9UNQ0|ABCG2\_HUMAN  
 sp|Q99P81|ABCG3\_MOUSE  
 sp|Q9H172|ABCG4\_HUMAN  
 sp|Q9H222|ABCG5\_HUMAN  
 sp|Q9H221|ABCG8\_HUMAN

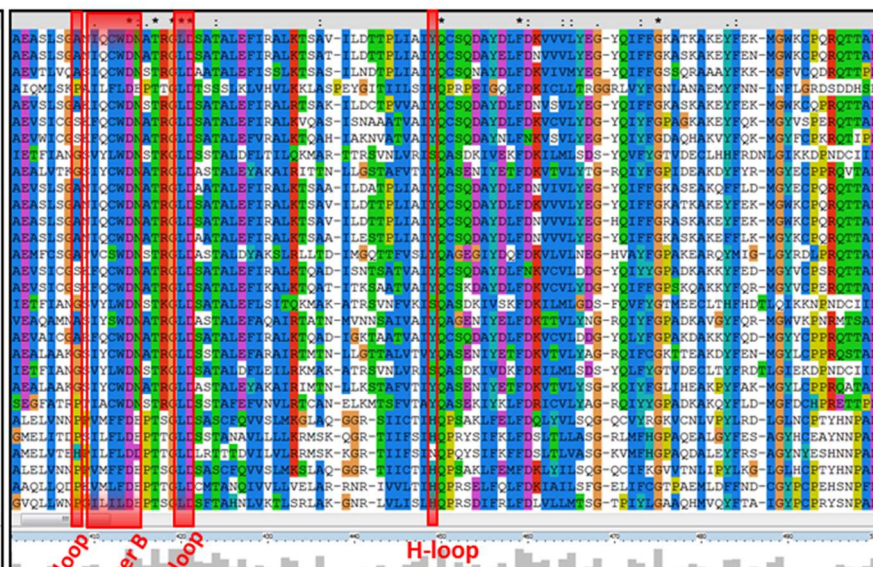

NBD1

sp|P43071|CDR1\_CaYEAST  
 sp|P78595|CDR2\_CaYEAST  
 sp|O42690|CDR3\_CaYEAST  
 tr|A0A1D8PC6|CDR6\_CaYEAST  
 tr|A0A1D8PK15|CDR11\_CaYEAST  
 sp|Q6FK23|CDR1\_CgYEAST  
 sp|O74208|PDH1\_CgYEAST  
 tr|Q6FUR1|AUS1\_CgYEAST  
 sp|Q6FQ23|SNQ2\_CgYEAST  
 sp|PIS57142|CDR1\_CaurYEAST  
 tr|Q8N555|CDR1\_CdYEAST  
 tr|Q8N554|CDR2\_CdYEAST  
 sp|EER33788|CDR1\_CtYEAST  
 tr|Q8X023|AFR1\_CnYEAST  
 sp|P33302|PDR5\_ScYEAST  
 sp|P32568|PDR10\_ScYEAST  
 sp|P40550|PDR11\_ScYEAST  
 sp|Q02785|PDR12\_ScYEAST  
 sp|Q04182|PDR15\_ScYEAST  
 sp|P53756|PDR18\_ScYEAST  
 sp|Q08409|AUS1\_ScYEAST  
 sp|P32568|SNQ2\_ScYEAST  
 sp|P41820|BFR1\_SpYEAST  
 sp|P45844|ABCG1\_HUMAN  
 sp|Q9UNQ0|ABCG2\_HUMAN  
 sp|Q99P81|ABCG3\_MOUSE  
 sp|Q9H172|ABCG4\_HUMAN  
 sp|Q9H222|ABCG5\_HUMAN  
 sp|Q9H221|ABCG8\_HUMAN

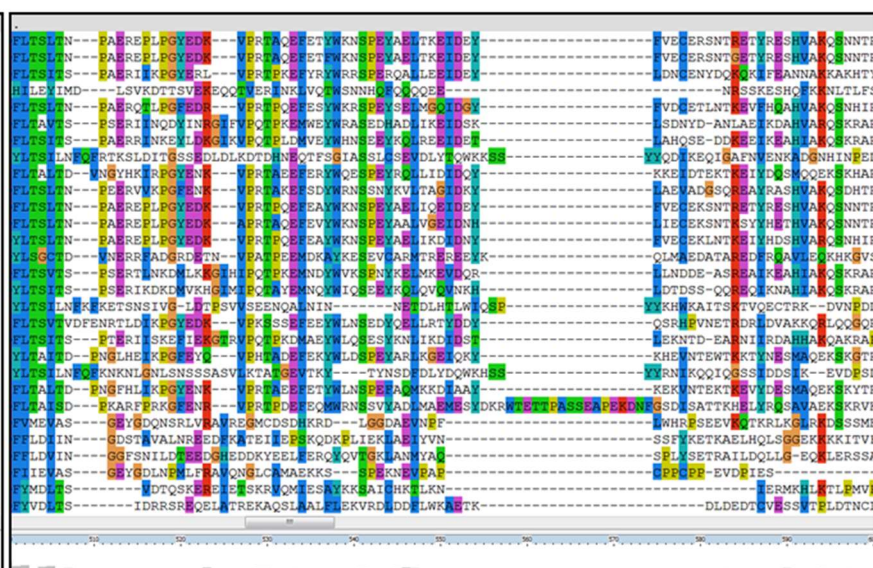

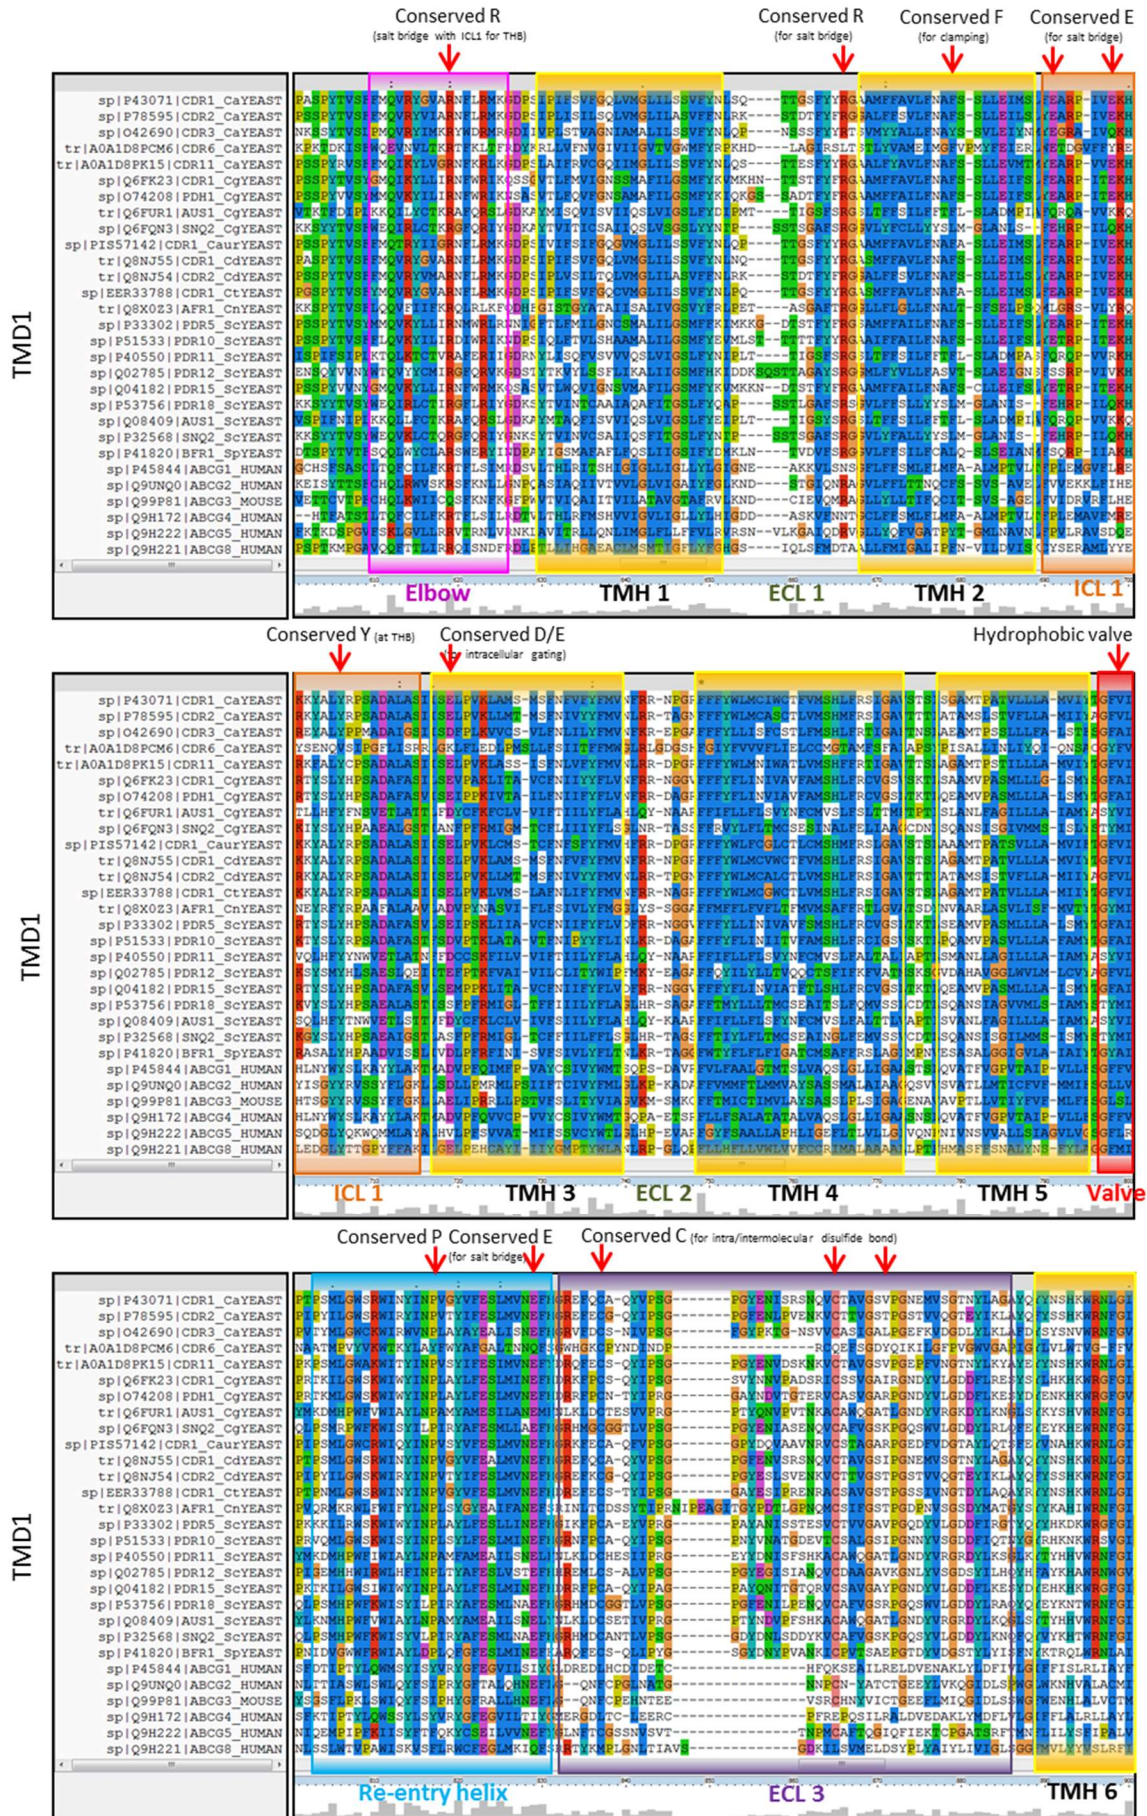

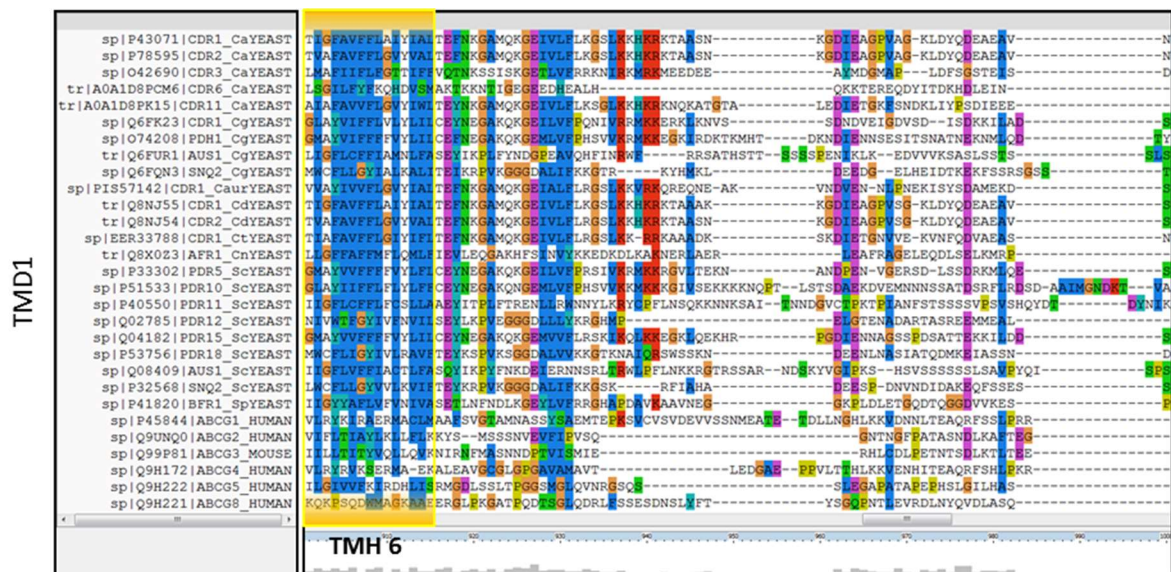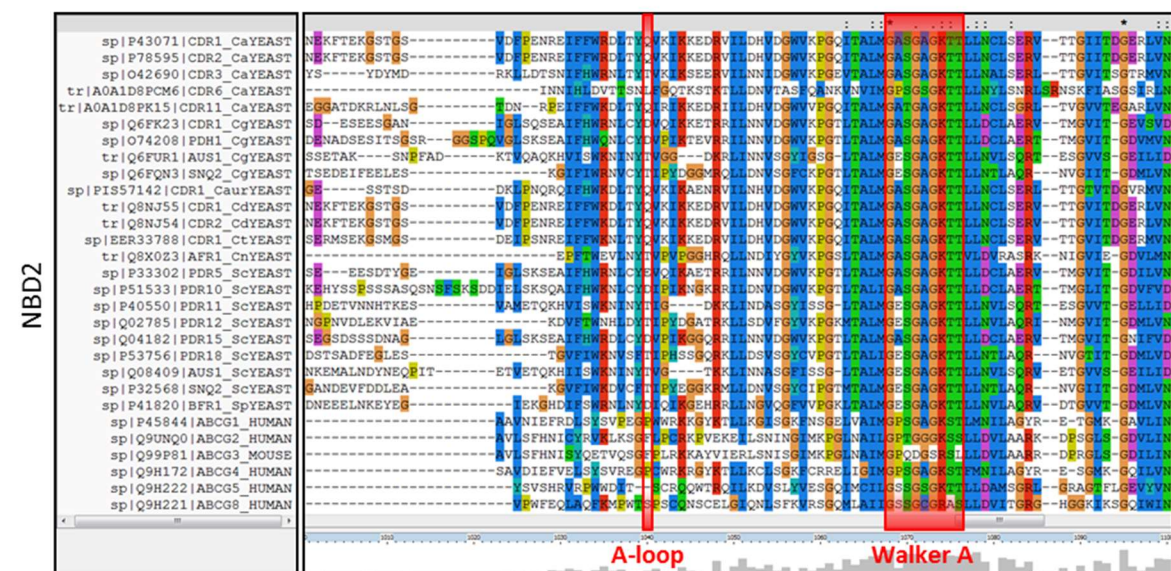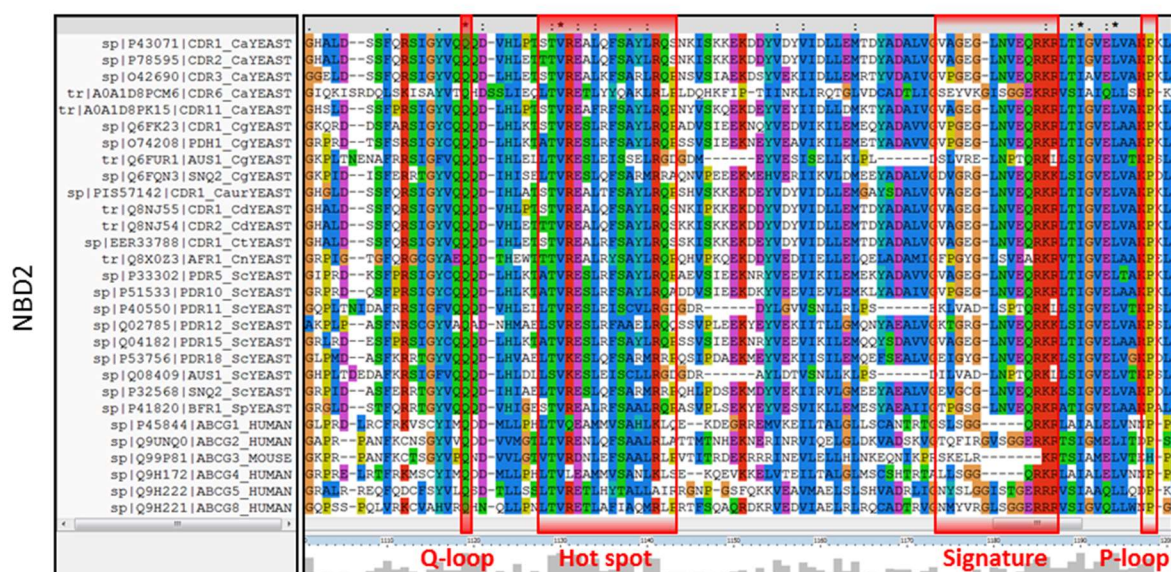

NBD2

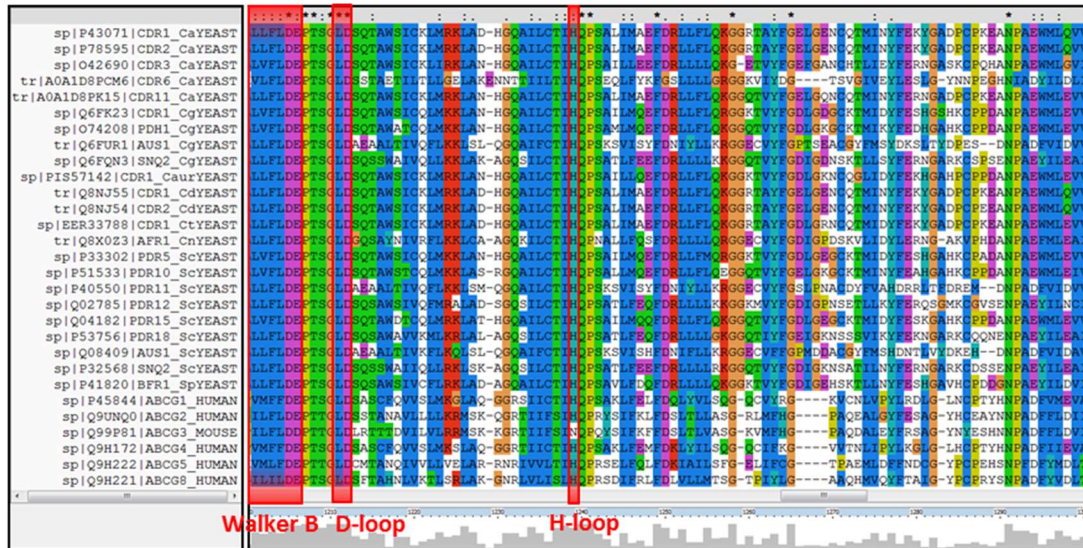

TMD2

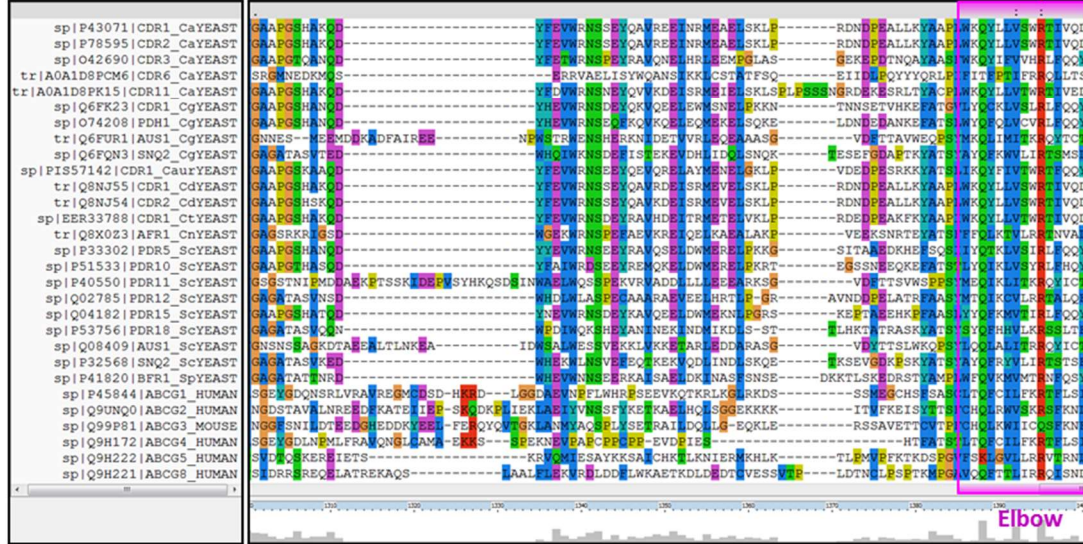

TMD2

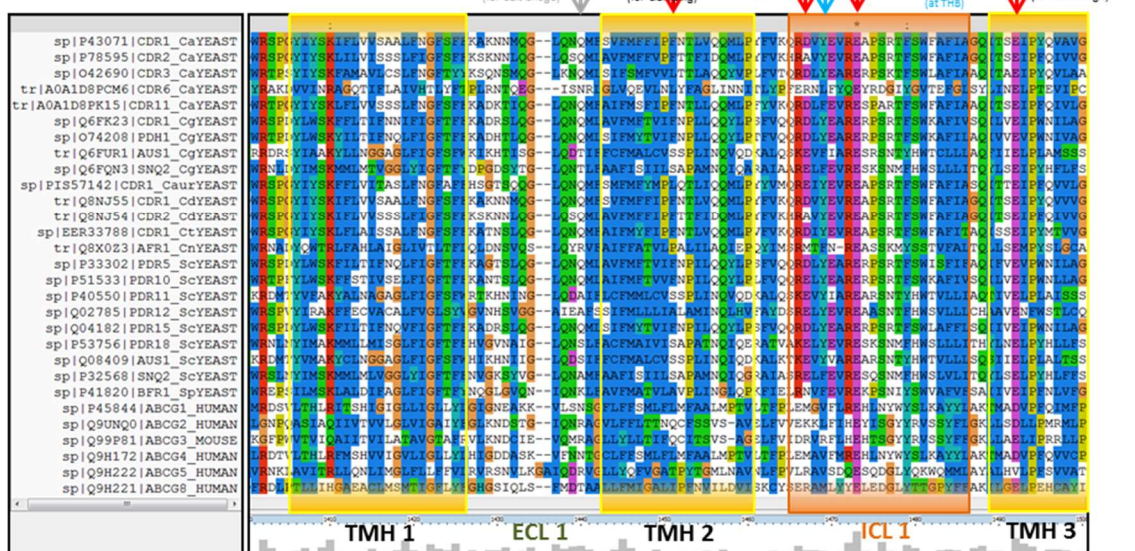

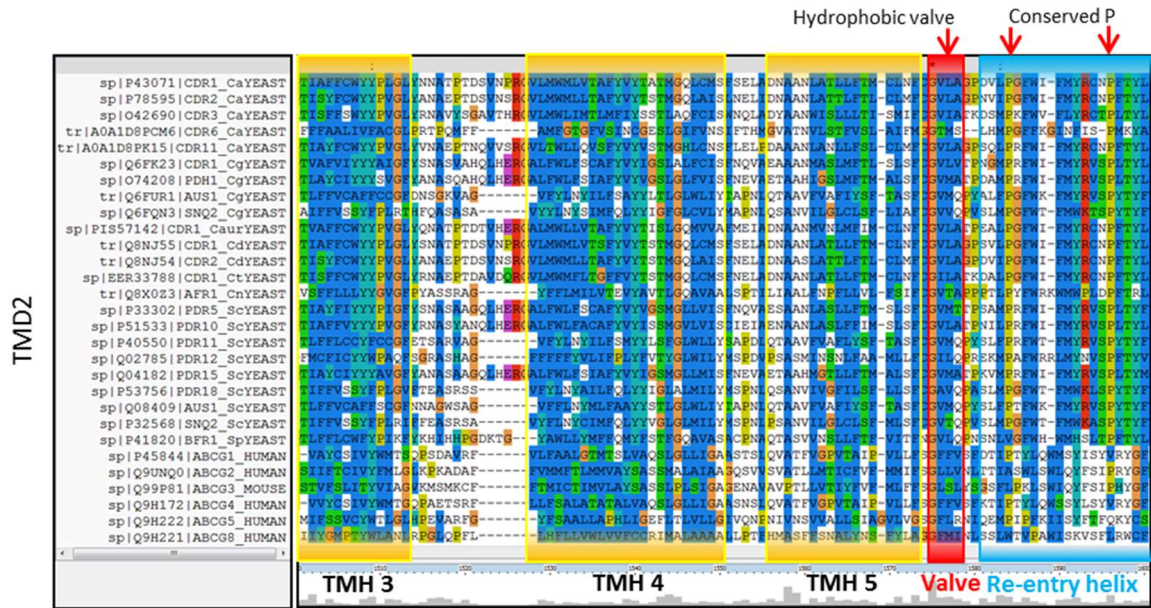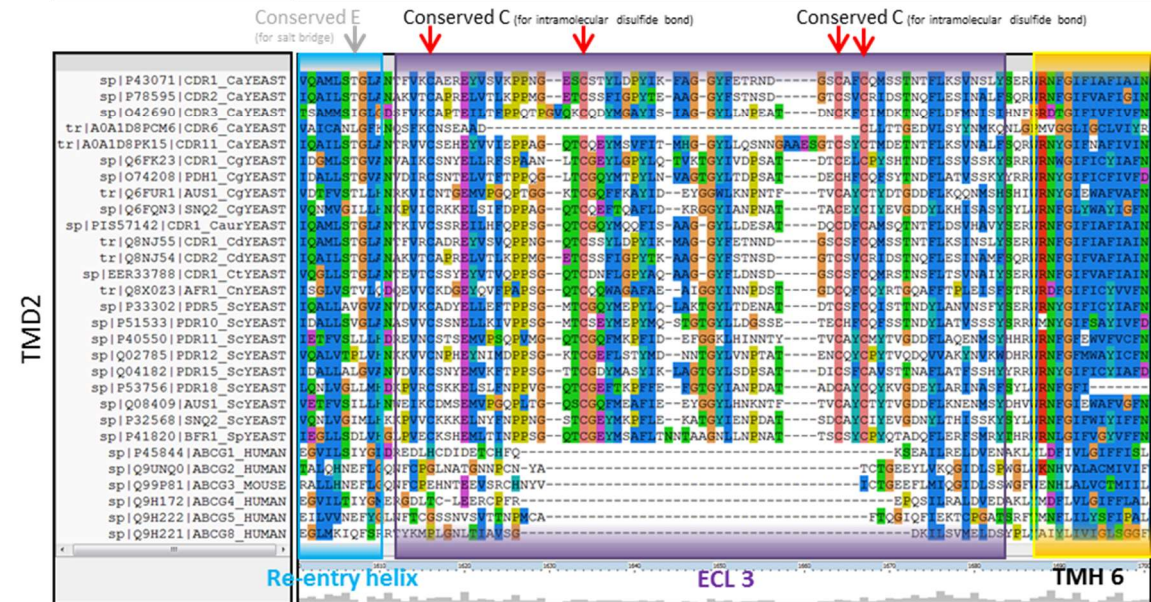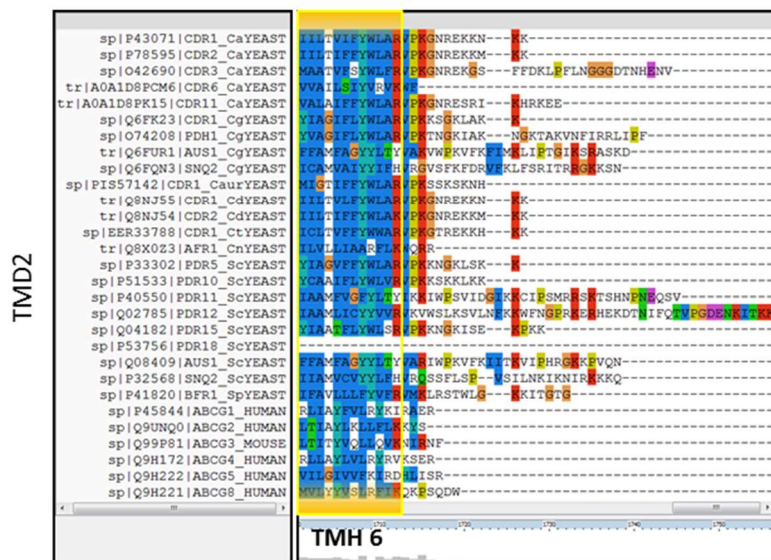

**Supplementary Figure S1: Amino acid sequence alignment of fungal ABC transporters (PDR subfamily) and mammalian ABCG subfamily.**

The multiple sequence alignments (MSA) were conducted using BioEdit and ClustalX2. Conserved residues are highlighted with the conservation scale as the height of gray bars at the bottom. Conserved motifs in the NBDs are highlighted in the red boxes, including A-loop, Walker A, Q-loop, hot spot helix, Signature loop, Pro-loop, Walker B, D-loop and H-loop, respectively. The putative conserved motifs in the TMDs are highlighted in color boxes, the elbow helix (pink), TMH1-TMH6 (yellow), ICL (orange), re-entry helix (blue) and ECL (violet), respectively. Ca: *Candida albicans*, Cg: *Candida glabrata*, Caur: *Candida auris*, Cd: *Candida dubliniensis*, Ct: *Candida tropicalis*, Cn: *Cryptococcus neoformans*, Sc: *Saccharomyces cerevisiae*, Sp: *Schizosaccharomyces pombe*.
